# Supplementary material for: Reversible photo-responsive gel–sol transitions of robust organogels based on an azobenzene-containing main-chain liquid crystalline polymer
Source: Royal Society of Chemistry journal article supplement (doi:10.1039/c9ra10161f), 2020-01-01
Supplement: c9ra10161f1.pdf [file c9ra10161f1.pdf]

## **SUPPORTING INFORMATION**

*for*

### **Reversible photo-responsive gel-sol transitions of robust organogels based on azobenzene-containing main chain liquid crystalline polymer**

Jing Wang,<sup>a</sup> Qian Jiang,<sup>a</sup> Xingtian Hao,<sup>a</sup> Hongchao Yan,<sup>a</sup> Haiyan Peng,<sup>a</sup> Bijin Xiong,<sup>a</sup>

Yonggui Liao,<sup>\*,a,b</sup> Xiaolin Xie<sup>a,b</sup>

<sup>a</sup> Key Laboratory of Material Chemistry for Energy Conversion and Storage Ministry of Education, Hubei Key Laboratory of Material Chemistry and Service Failure, School of Chemistry and Chemical Engineering, Huazhong University of Science and Technology, Wuhan 430074, China. E-mail: ygliao@mail.hust.edu.cn

<sup>b</sup> National Anti-counterfeit Engineering Research Center, Huazhong University of Science and Technology, Wuhan 430074, China

**Table S1** The  $\alpha$ ,  $\beta$  and  $\pi^*$  values for different solvents

| Solvent    | $\alpha$ | $\pi^*$ | $\beta$ |
|------------|----------|---------|---------|
| THF        | 0        | 0.51    | 0.54    |
| dioxane    | 0        | 0.55    | 0.37    |
| chloroform | 0.44     | 0.58    | 0       |
| DMF        | 0        | 0.88    | 0.76    |

**Table S2** Summary of the  $K_{tc}$ ,  $t_\infty$  and P of UV light irradiation

| Sample                                                                               | $K_{tc}$ (s <sup>-1</sup> ) | $P^a$ (mW cm <sup>-2</sup> ) | $t_\infty^b$ (s) | Reference |
|--------------------------------------------------------------------------------------|-----------------------------|------------------------------|------------------|-----------|
| $\beta$ -CD-Azo-C <sub>8</sub>                                                       | 0.077                       | 2.6                          | 60               | [26]      |
| A9ABT                                                                                |                             | 3                            | 540              | [27]      |
| Azopy-C <sub>10</sub> •TFDIB                                                         |                             | 3                            | 240              | [28]      |
| Dopant2                                                                              | 0.115                       | 3.6                          | 51               | [29]      |
| C0                                                                                   |                             | 3                            | 600              | [30]      |
| C10                                                                                  |                             | 3                            | 180              | [30]      |
| CLCP                                                                                 |                             | 20                           | 900              | [31]      |
| PEO <sub>48</sub> - <i>b</i> -P(AZO <sub>10</sub> - <i>co</i> -NIPAM <sub>10</sub> ) |                             | 90                           | 60               | [32]      |
| PAA-Azo                                                                              |                             | 0.45                         | 90               | [9]       |
| AZO-mLCP                                                                             | 0.035                       | 0.28                         | 78               | Our work  |

<sup>a</sup> P represents the intensity of the UV light.

<sup>b</sup>  $t_{\infty}$  indicates the time to the photo-stationary state.

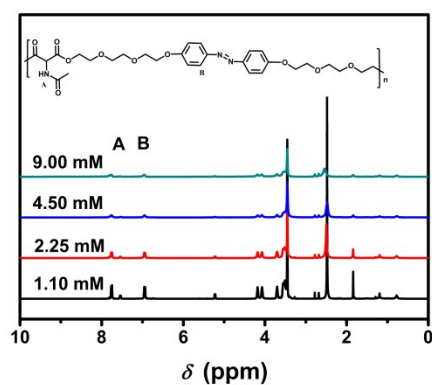

**Fig. S1** <sup>1</sup>H NMR spectra of Azo-mLCP in *d*<sub>8</sub>-dioxane at different concentrations.

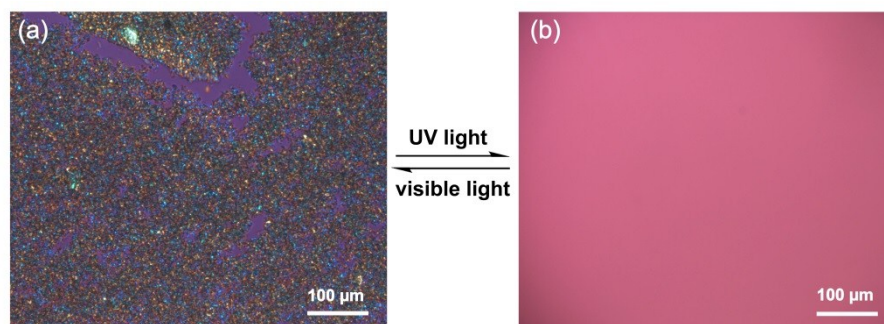

**Fig. S2** POM photographs of the mixture of 8 wt% Azo-mLCP in dioxane captured at 25 °C before UV irradiation (a) and after UV irradiation (b).
